# Supplementary material for: Photobacterium sanctipauli sp. nov. isolated from bleached Madracis decactis (Scleractinia) in the St Peter & St Paul Archipelago, Mid-Atlantic Ridge, Brazil
Source: PubMed Central journal article supplement (PMC4081156; doi:10.7717/peerj.427), 2014-06-19
Supplement: peerj-02-427-s001.pdf [file peerj-02-427-s001.pdf]

**Table S1. Upper** GenBank accession numbers for the 16S rRNA gene, *recA* and *rpoA* housekeeping genes and genome sequences of *Photobacterium sanctipauli* sp. nov.; and for *recA* and *rpoA* of *P. gaetbulicola* LMG 27839<sup>T</sup> (data from this study). **Lower** Accession numbers for the *Photobacterium* strains' genomes used for GGD calculation (data publicly available at GenBank).

| Strains                                            | 16S rRNA | <i>recA</i> | <i>rpoA</i> | Genomes        |
|----------------------------------------------------|----------|-------------|-------------|----------------|
| <b>A-394<sup>T</sup></b>                           | KC751088 | KF748540    | KF748544    | JGVO00000000   |
| <b>A-373</b>                                       | KC751065 | KF748538    | KF748542    |                |
| <b>A-379</b>                                       | KC751086 | KF748539    | KF748543    |                |
| <b>A-397</b>                                       | KC751086 | KF748541    | KF748545    |                |
| <b>A-398</b>                                       | KC751091 |             |             |                |
| <i>P. gaetbulicola</i> LMG 27839 <sup>T</sup>      | KF771650 | KF771651    |             |                |
| <i>P. angustum</i> S14                             |          |             |             | AAOJ00000000.1 |
| <i>P. damsela</i> subsp. <i>damsela</i> CIP 102761 |          |             |             | ADBS00000000.1 |
| <i>P. halotolerans</i> DSM18316                    |          |             |             | AULG00000000.1 |
| <i>P. leiognathi</i> Irivu.4.1                     |          |             |             | BANQ00000000.1 |
| <i>P. profundum</i> 3TCK                           |          |             |             | AAPH00000000.1 |
