# Supplementary material for: Photobacterium sanctipauli sp. nov. isolated from bleached Madracis decactis (Scleractinia) in the St Peter & St Paul Archipelago, Mid-Atlantic Ridge, Brazil
Source: PubMed Central journal article supplement (PMC4081156; doi:10.7717/peerj.427), 2014-06-19
Supplement: peerj-02-427-s002.pdf [file peerj-02-427-s002.pdf]

**Table S2.** Strains of *Photobacterium sanctipauli* sp. nov. and source information

| Isolate                                                                           | Source                                     | Location<br>Isolation date   | Reference             |
|-----------------------------------------------------------------------------------|--------------------------------------------|------------------------------|-----------------------|
| A-373 (CAIM 1893)                                                                 |                                            | St Peter & St Paul           |                       |
| A-379 (R-52166)                                                                   | Bleached tissues                           | Archipelago                  |                       |
| <b>A-394<sup>T</sup></b><br><b>(LMG 27910<sup>T</sup>; CAIM 1892<sup>T</sup>)</b> | <i>Madracis decactis</i><br>(Scleractinia) | Mid-Atlantic Ridge<br>Brazil | (Moreira et al. 2014) |
| A-397 (R-52168)                                                                   |                                            | 00°56'N; 29°22'W             |                       |
| A-398 (R-52169)                                                                   |                                            | 22/nov/2010                  |                       |

#### Reference

Moreira APB, Tonon LAC, Cecilia do Valle PP, Alves Jr N, Amado-Filho GM, Francini-Filho RB, Paranhos R, and Thompson FL. 2014. Culturable Heterotrophic Bacteria Associated with Healthy and Bleached Scleractinian *Madracis decactis* and the Fireworm *Hermodice carunculata* from the Remote St. Peter and St. Paul Archipelago, Brazil. *Curr Microbiol* 68:38-46.
