# Supplementary material for: Photobacterium sanctipauli sp. nov. isolated from bleached Madracis decactis (Scleractinia) in the St Peter & St Paul Archipelago, Mid-Atlantic Ridge, Brazil
Source: PubMed Central journal article supplement (PMC4081156; doi:10.7717/peerj.427), 2014-06-19
Supplement: peerj-02-427-s003.pdf [file peerj-02-427-s003.pdf]

**Table S3.** Statistics and general features of A-394<sup>T</sup> (=LMG 27910<sup>T</sup>=CAIM 1892<sup>T</sup>) genome determined in RAST environment:

| <b>Features</b>                         | <b>as uploaded</b> | <b>after splitting into scaffolds</b> |
|-----------------------------------------|--------------------|---------------------------------------|
| Size (bp)                               | 5,725,370          | 5,718,047                             |
| Contigs                                 | 1,805              | 1,830                                 |
| Shortest contig size                    | 100                | 100                                   |
| Median contig size                      | 2,005              | 1,988                                 |
| Mean sequence size                      | 3,172.0            | 3,124.2                               |
| Longest contig size                     | 27,307             | 24,391                                |
| Content GC (%)                          | 48.1               | 48.1                                  |
| <b>Subsystems (n=499)</b>               |                    |                                       |
| RNAs (t,rRNAs)                          | 58                 |                                       |
| Predicted ORFs                          | 5,008              |                                       |
| Features (%)                            | In Subsystem=47    | Not in subsystem=53                   |
| Total (n <sup>0</sup> )                 | 2,353              | 2,655                                 |
| Hypothetical Proteins (n <sup>0</sup> ) | 144                | 1,301                                 |
| Non-Hypothetical (n <sup>0</sup> )      | 2,209              | 1,354                                 |
