# Supplementary material for: Photobacterium sanctipauli sp. nov. isolated from bleached Madracis decactis (Scleractinia) in the St Peter & St Paul Archipelago, Mid-Atlantic Ridge, Brazil
Source: PubMed Central journal article supplement (PMC4081156; doi:10.7717/peerj.427), 2014-06-19
Supplement: peerj-02-427-s004.pdf [file peerj-02-427-s004.pdf]

**Table S4.** Cellular fatty acids content of *Photobacterium sanctipauli* sp. nov. and related taxa of the genus *Photobacterium*. Taxa: **1**, *P. sanctipauli* (range profile of five strains); **2**, *P. rosenbergii* LMG 22223<sup>T</sup> (Thompson et al. 2005); **3**, *P. gaetbulicola* Gung47<sup>T</sup>; and **4**, *P. lutimaris* LMG 25278<sup>T</sup> (Kim et al. 2010). Summed feature 2 comprises C<sub>12:0</sub> ALDE, iso-C<sub>16:1</sub> I and/or C<sub>14:0</sub> 3-OH and/or an unidentified fatty acid with equivalent chain length of 10.928. Summed feature 3 comprises C<sub>16:1</sub>ω7c and/or iso-C<sub>15</sub> 2-OH. Data are expressed as percentages of total fatty acids. Fatty acids representing <1 % are not shown, except for C<sub>18:0</sub>, because it was represented in all strains with approximately the same intensity

| Fatty acids            | 1         | 2     | 3    | 4    |
|------------------------|-----------|-------|------|------|
| C <sub>12:0</sub>      | 3.7–4.5   | 2     | 1.7  | 2.4  |
| C <sub>12:0</sub> 3-OH | 2.5-3.6   | 2-3   | 2.8  | 2.6  |
| C <sub>14:0</sub>      | 4.7-5.8   | 3-4   | 4.2  | 2.4  |
| C <sub>15:0</sub> iso  | 0.6-1.1   | 2-4   | 6.9  | 5    |
| C <sub>16:0</sub> iso  | -         | 1.9   | 0.4  | -    |
| C <sub>16:0</sub>      | 18.5-21.4 | 10-15 | 14   | 13.1 |
| C <sub>17:0</sub>      | 1.2-1.6   | 1     | 1    | -    |
| C <sub>17:0</sub> iso  | 0.7-1.5   | 3-6   | 3.5  | 1.8  |
| C <sub>17:1</sub> ω8c  | 0.3-1.1   | 1     | 0.6  | -    |
| C <sub>18:0</sub>      | 0.5-0.7   | -     | -    | -    |
| C <sub>18:1</sub> ω6c  | 0-3.3     | -     | 3.1  | -    |
| C <sub>18:1</sub> ω7c  | 7.9-12.7  | 17-19 | 10.3 | 13   |
| Summed feature 2       | 3.7-4.7   | 2-3   | 3.7  | 3    |
| Summed feature 3       | 43-45.5   | 41-44 | 33.6 | 43.3 |

## References

- Kim Y-O, Kim K-K, Park S, Kang S-J, Lee J-H, Lee S-J, Oh T-K, and Yoon J-H. 2010. *Photobacterium gaetbulicola* sp. nov., a lipolytic bacterium isolated from a tidal flat sediment. *Int J Syst Evol Microbiol* 60:2587-2591.
- Thompson F, Thompson C, Naser S, Hoste B, Vandemeulebroecke K, Munn C, Bourne D, and Swings J. 2005. *Photobacterium rosenbergii* sp. nov. and *Enterovibrio coralii* sp. nov., vibrios associated with coral bleaching. *Int J Syst Evol Microbiol* 55:913-917.
