# Supplementary material for: Photobacterium sanctipauli sp. nov. isolated from bleached Madracis decactis (Scleractinia) in the St Peter & St Paul Archipelago, Mid-Atlantic Ridge, Brazil
Source: PubMed Central journal article supplement (PMC4081156; doi:10.7717/peerj.427), 2014-06-19
Supplement: peerj-02-427-s005.pdf [file peerj-02-427-s005.pdf]

**Table S5.** Phenotypic variability amongst representative strains of *P. sanctipauli* sp. nov. +, positive; -, negative; w, weak

| Test of                        | A-373 | A-379 | A-394 <sup>1</sup> | A-397 | A-398 |
|--------------------------------|-------|-------|--------------------|-------|-------|
| Esterase (C 4)                 | -     | +     | -                  | +     | +     |
| Esterase lipase (C8)           | +     | +     | -                  | +     | +     |
| Tryptophane deaminase          | -     | w     | w                  | +     | +     |
| Indole production              | -     | w     | -                  | +     | +     |
| <i>Fermentation/oxidation:</i> |       |       |                    |       |       |
| Citrate                        | -     | -     | -                  | w     | w     |
| D-Maltose                      | +     | w     | -                  | w     | w     |
| D-trehalose                    | +     | w     | -                  | +     | +     |
| D-Cellobiose                   | +     | w     | w                  | -     | -     |
| Sucrose                        | w     | w     | -                  | w     | -     |
| D-Melibiose                    | w     | -     | -                  | -     | -     |
| $\beta$ -Methyl-D-Glucoside    | -     | -     | -                  | w     | w     |
| D-Fructose                     | +     | w     | -                  | +     | +     |
| L-Rhamnose                     | w     | -     | -                  | -     | -     |
| D-Mannitol                     | +     | -     | -                  | -     | -     |
| <i>Myo</i> -Inositol           | w     | -     | -                  | -     | -     |
| DNA G+C content (mol%)         | 47.2  | 48.4  | 48.2               | 49.4  | 49.7  |
